# Supplementary material for: Combinatorial screening of biochemical and physical signals for phenotypic regulation of stem cell–based cartilage tissue engineering
Source: PubMed Central journal article supplement — Sci Adv. 2020 May 22;6(21):eaaz5913. doi: 10.1126/sciadv.aaz5913 (PMC7244269; doi:10.1126/sciadv.aaz5913), 2020-05-22
Supplement: aaz5913_SM.pdf [file aaz5913_SM.pdf]

## Supplementary Materials for

### **Combinatorial screening of biochemical and physical signals for phenotypic regulation of stem cell–based cartilage tissue engineering**

Junmin Lee, Oju Jeon, Ming Kong, Amr A. Abdeen, Jung-Youn Shin, Ha Neul Lee, Yu Bin Lee, Wujin Sun, Praveen Bandaru, Daniel S. Alt, KangJu Lee, Han-Jun Kim, Sang Jin Lee, Somali Chaterji, Su Ryon Shin, Eben Alsberg\*, Ali Khademhosseini\*

\*Corresponding author. Email: ealsberg@uic.edu (E.A.); khademh@terasaki.org (A.K.)

Published 22 May 2020, *Sci. Adv.* **6**, eaaz5913 (2020)  
DOI: 10.1126/sciadv.aaz5913

#### **This PDF file includes:**

Figs. S1 to S9  
Table S1

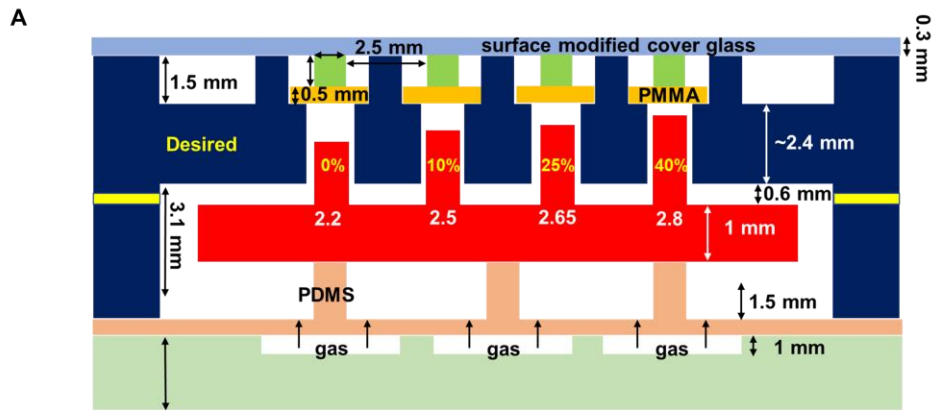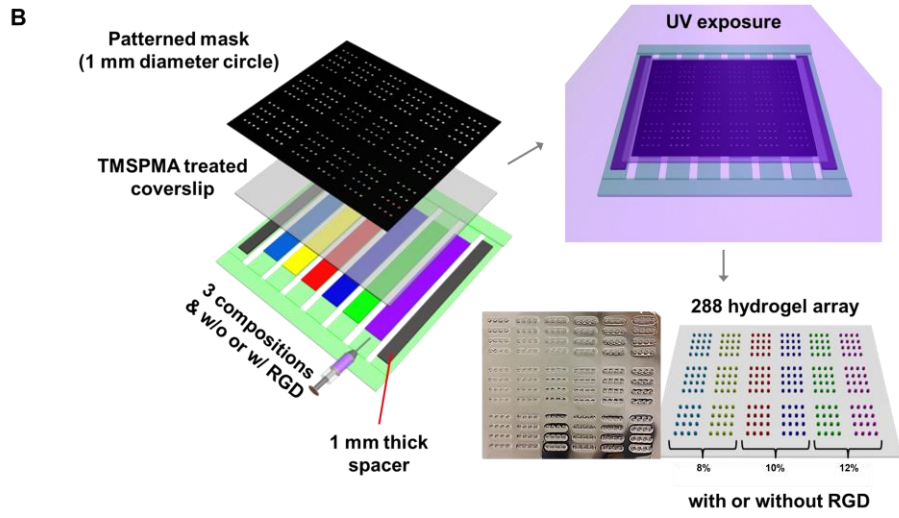

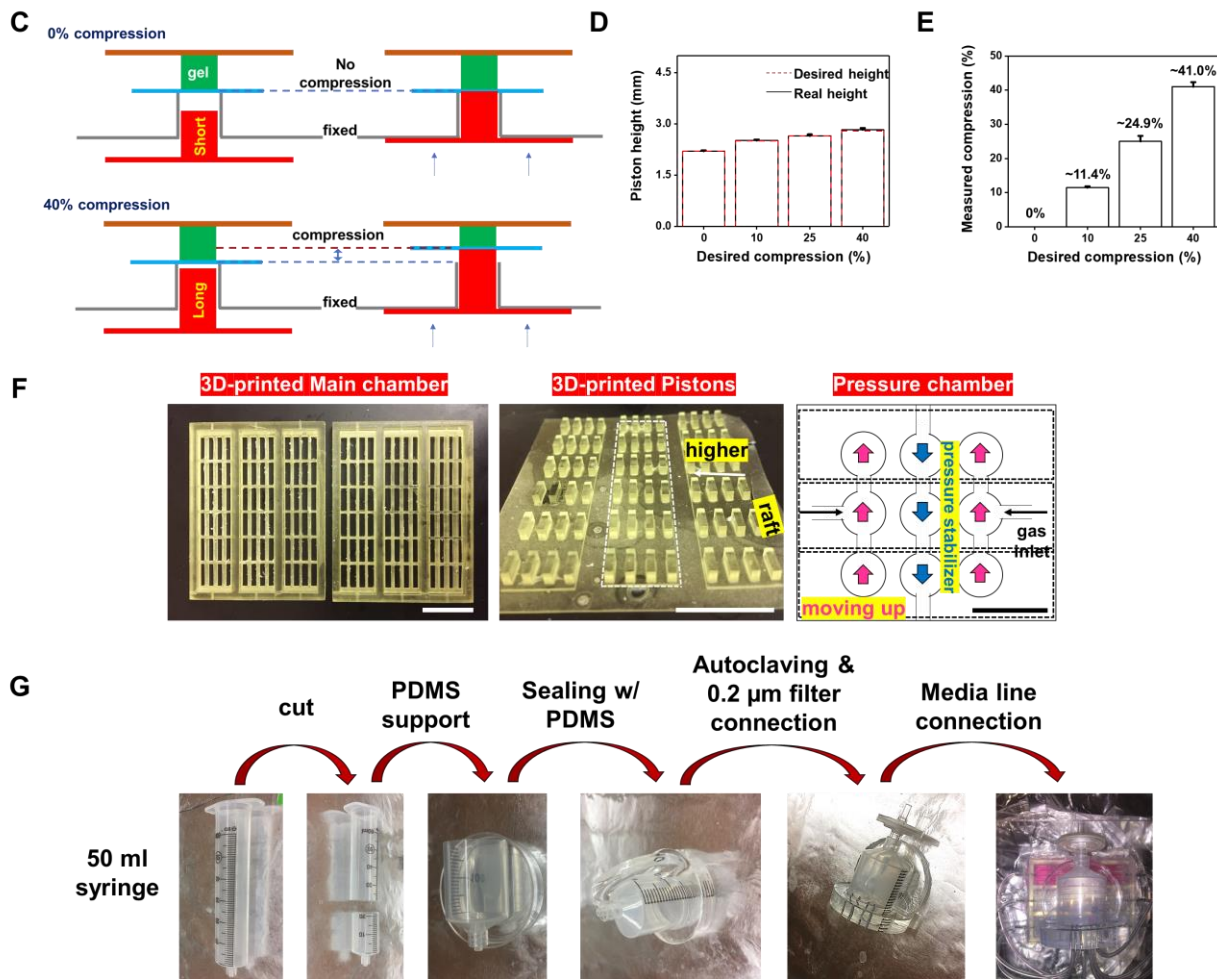

**Fig. S1. Design of combinatorial system for screening of biochemical and physical signals for chondrogenesis of hMSCs.** (A) Schematic showing cross-sectional view of combinatorial system (i.e., TMSPA-treated glass slides with hydrogel arrays, caps to maintain gel height, main chamber, pistons with different height, membrane with pillars, pressure chamber). (B) Illustrations showing the process to separate six different biomaterial conditions (three different PEG:OMA compositions: 8%, 10%, 12% and with or without RGD) and fabricate 288 hydrogel arrays on a TMSPA-treated glass slide (photo credit: Junmin Lee, UCLA). (C) Schematic illustrations of the principle of compression. (D) Measured height of pistons with desired height of 2.2, 2.5, 2.65, 2.8 mm using Auto CAD drawing and 3D printing ( $N = 4$ ). (E) Measured compression of hydrogels in combinatorial system with desired strain of 0, 10, 25, 40% ( $N = 4$ ). (F) Representative images showing 3D-printed main chambers and pistons and design of pressure chamber (photo credit: Junmin Lee, UCLA). Scale bar is 20 mm. (G) Representative images showing the procedure to make a device to be open system preventing pressure accumulation which leads to a leaking issue (photo credit: Junmin Lee, UCLA).

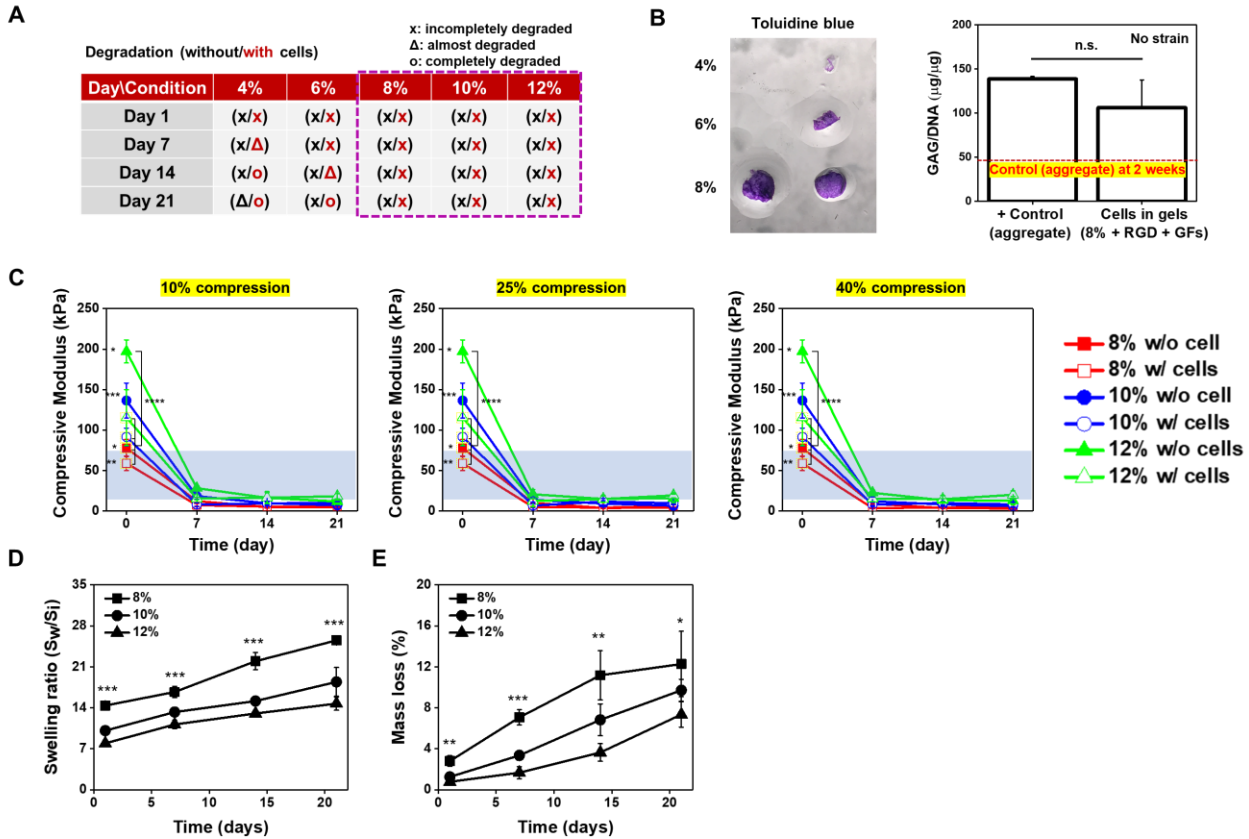

**Fig. S2. Selection of PEG/OMA hybrid biomaterial compositions and their characteristics.** (A) Selection of OMA/PEG hybrid biomaterial compositions after 21 days of degradation ( $N = 3$ ). (B) Representative photograph of Toluidine Blue staining after 21 days of chondrogenic differentiation (4%, 6%, 8%) and quantitative GAG deposition analysis of hMSCs cultured in 8% PEG/OMA hydrogels for 14 or 21 days. Positive control: aggregation culture of hMSCs for 14 or 21 days ( $N = 3$ ). (One-way ANOVA with Tukey post hoc testing) (C) Time profile of PEG/OMA hydrogel (with or without cells) degradation with compression (10, 25, and 40%) for 21 days ( $N = 5$ ). The same samples were used for the day 0 measurements in all 3 plots. (One-way ANOVA with Tukey post hoc test; \* $p < 0.05$  compared with 10% w/o cell group, \*\* $p < 0.05$  compared with 12% w/ cells group, \*\*\* $p < 0.005$  compared with 8% w/ cells and \*\*\*\* $p < 0.0005$  compared with 12% w/o cell group at day 0). (D) Swelling ratio and (E) mass loss of PEG/OMA hydrogels without compression for 21 days ( $N = 3$ ). (\* $p < 0.05$ , \*\* $p < 0.005$ , \*\*\* $p < 0.0005$  based on one-way ANOVA with Tukey post hoc testing).

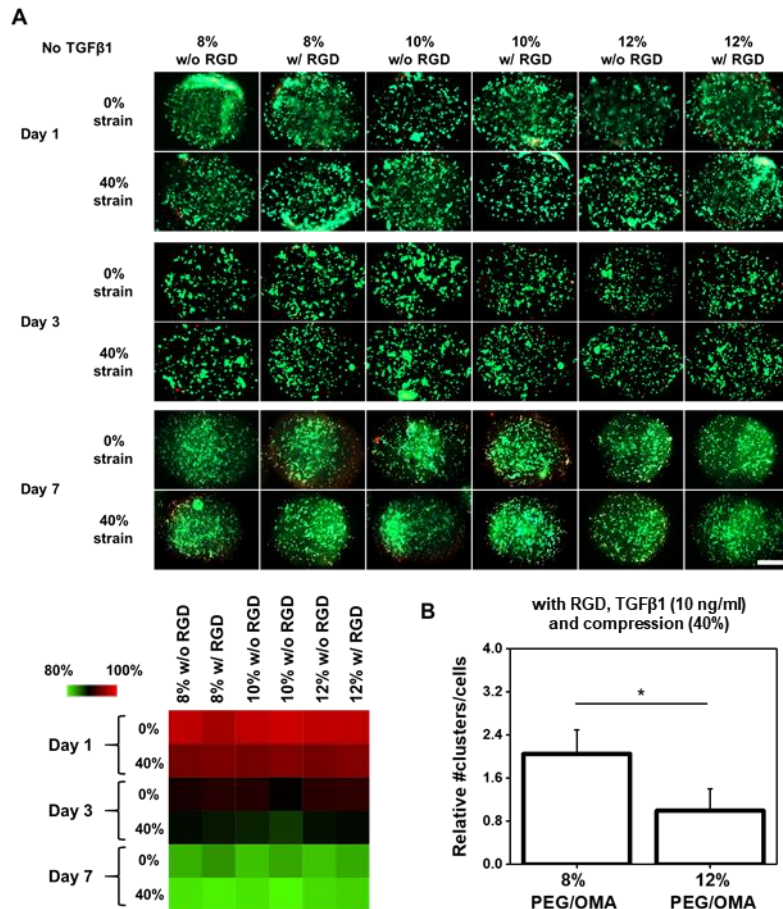

**Fig. S3. Viability and relative cluster numbers of hMSCs cultured in PEG/OMA hybrid hydrogels.** (A) Representative Live/Dead assay images of hMSCs and quantification of cell viability in different conditions at day 1, 3, and 7 days ( $N = 4$ ). Scale bar, 300  $\mu\text{m}$ . (B) Quantitative cluster number of hMSCs after 21 days of chondrogenic differentiation (8% and 12% PEG/OMA hydrogels) with the presence of other parameters ( $N = 5$ ). Scale bar, 30  $\mu\text{m}$ .

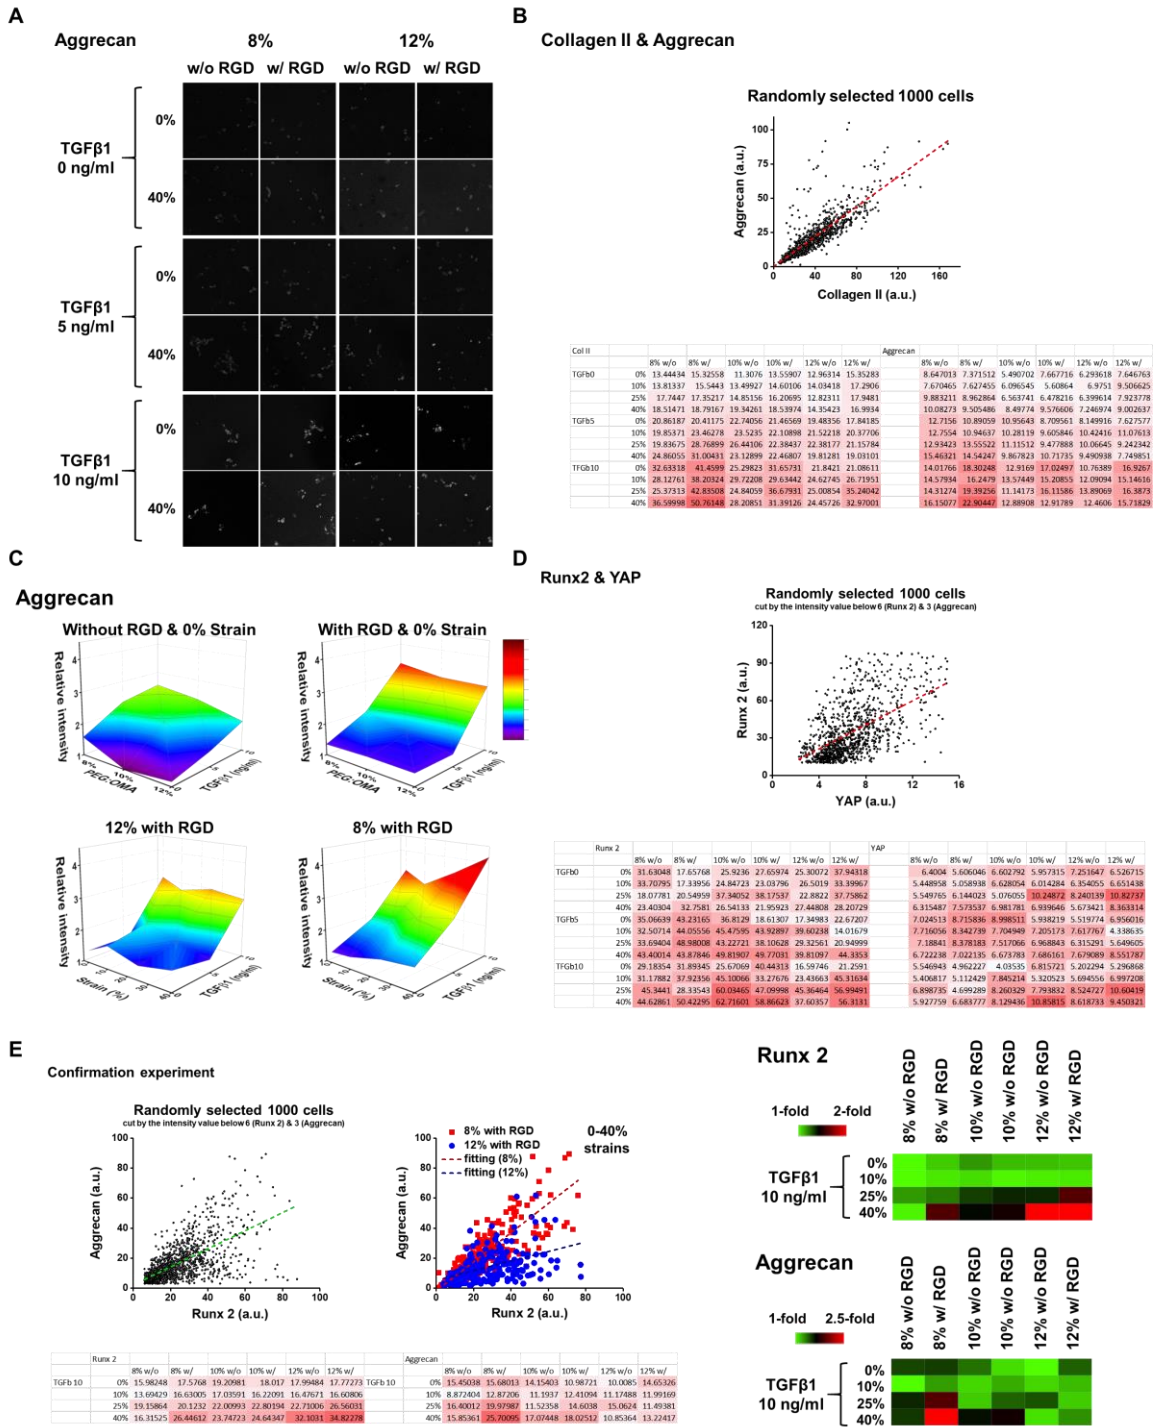

**Fig. S4. Expression levels of articular and hypertrophic markers for hMSCs guided by different levels of both degradation and stiffness.** (A) Representative 3D confocal images of hMSCs stained with Aggrecan in different combinations of parameters. (B) Plot of measured immunofluorescence intensity data for 1000 randomly selected cells cultured for 21 days and co-stained with Collagen II and Aggrecan. Averaged intensity of cells cultured in different conditions for 21 days ( $N = 4$ ). (C) Surface plot displaying the effect of the two variables on chondrogenic marker expression (Aggrecan) of hMSCs when other two factors are fixed. (D) Plot of measured immunofluorescence intensity data for randomly selected 1000 cells cultured for 21 days and co-stained with Runx2 and YAP. Averaged intensity of cells cultured in different conditions for 21 days ( $N = 4$ ). (E) Plot of measured immunofluorescence intensity data for 1000 randomly selected cells cultured for 21 days and co-stained with Runx2 and Aggrecan. Intensity of co-stained markers for the group of cells cultured in 8% or 12% PEG/OMA hydrogels with RGD presence for 21 days. Quantified heatmaps of Runx2 and YAP for cells encapsulated in the hydrogel micro-arrays cultured with the combinations of some selected factors for 21 days ( $N = 4$ ).

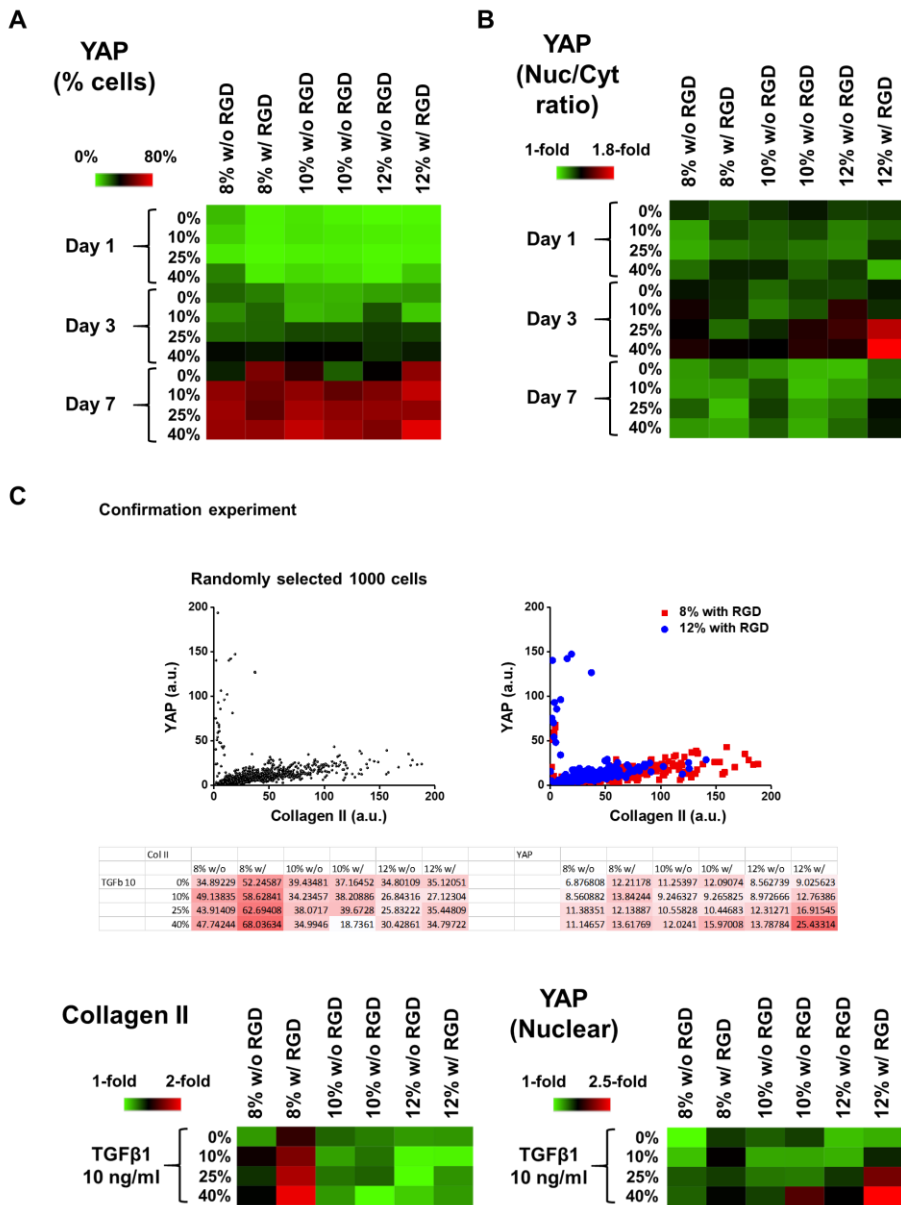

**Fig. 5. YAP quantification and staining results revealing hypertrophic chondrogenesis of hMSCs through YAP-dependent mechanotransduction.** Quantified heatmaps of (A) % cells over the threshold and (B) nuclear/cytoplasm intensity ratio at day 1, 3, 7 to define the role of YAP in lineage specification of hMSCs ( $N = 4$ ). (C) Plot of measured immunofluorescence intensity data for 1000 randomly selected cells cultured for 21 days and co-stained with Collagen II and YAP. Intensity of co-stained markers for the group of cells cultured in 8% or 12% PEG/OMA hydrogels with RGD presence for 21 days. Quantified heatmaps of Collagen II and YAP for cells encapsulated in the hydrogel microarrays cultured with the combinations of some selected factors for 21 days ( $N = 4$ ).

|         | PEG:OMA | RGD     | Strain | TGF- $\beta$ | Col II    | Aggrecan  | Runx2     | YAP      | Col II scaled | Aggrecan scaled | Runx2 scaled | YAP scaled | score    |
|---------|---------|---------|--------|--------------|-----------|-----------|-----------|----------|---------------|-----------------|--------------|------------|----------|
| Rank 1  | 8%      | w RGD   | 25     | 10           | 46.039439 | 20.252768 | 27.088213 | 4.638592 | 0.961518      | 0.962677        | 0.368590     | 0.064861   | 0.372686 |
| Rank 2  | 8%      | w RGD   | 0      | 10           | 39.300062 | 17.019819 | 21.266216 | 4.489886 | 0.775980      | 0.757281        | 0.223295     | 0.041950   | 0.317004 |
| Rank 3  | 8%      | w RGD   | 40     | 10           | 47.437241 | 20.840235 | 42.584921 | 6.079284 | 1.000000      | 1.000000        | 0.755327     | 0.286827   | 0.239461 |
| Rank 4  | 10%     | w RGD   | 0      | 10           | 34.058895 | 19.343055 | 27.317505 | 6.328301 | 0.631689      | 0.904881        | 0.374312     | 0.325193   | 0.209266 |
| Rank 5  | 8%      | w/o RGD | 0      | 10           | 31.245410 | 13.449179 | 19.752073 | 5.315387 | 0.554233      | 0.530432        | 0.185508     | 0.169134   | 0.182506 |
| Rank 6  | 8%      | w RGD   | 10     | 10           | 35.651932 | 14.427535 | 34.322415 | 4.717333 | 0.675546      | 0.592588        | 0.549127     | 0.076993   | 0.160504 |
| Rank 7  | 12%     | w RGD   | 0      | 10           | 20.830888 | 14.543805 | 18.795868 | 5.022307 | 0.267517      | 0.599975        | 0.161645     | 0.123980   | 0.145467 |
| Rank 8  | 10%     | w RGD   | 10     | 10           | 30.723548 | 15.413718 | 32.725678 | 5.153268 | 0.539866      | 0.655243        | 0.509279     | 0.144157   | 0.135418 |
| Rank 9  | 12%     | w RGD   | 10     | 5            | 19.084896 | 10.061776 | 12.318693 | 4.217604 | 0.219450      | 0.315223        | 0.000000     | 0.000000   | 0.133668 |
| Rank 10 | 10%     | w RGD   | 25     | 10           | 42.477124 | 18.773962 | 41.535888 | 7.283922 | 0.863446      | 0.868726        | 0.729147     | 0.472425   | 0.132650 |

Metric to compare different combinations:

$$\text{score} = 0.25 \times \text{Col}_{\text{scaled}} + 0.25 \times \text{Aggrecan}_{\text{scaled}} - 0.25 \times \text{Runx2}_{\text{scaled}} - 0.25 \times \text{YAP}_{\text{scaled}}$$

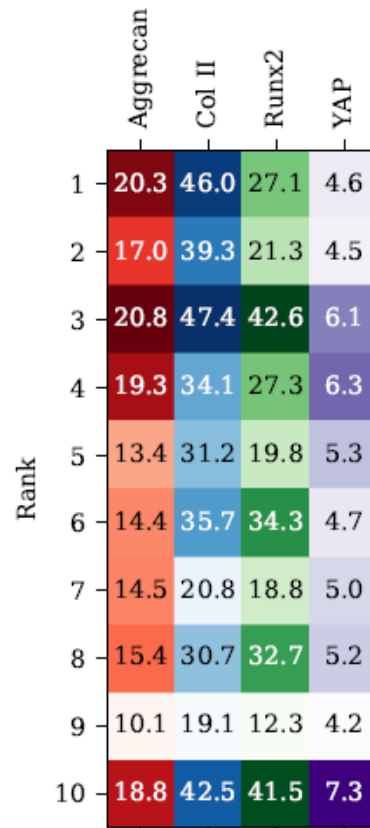

**Fig. S6. Top-10 combinations for the best chondrogenic metrics.** Light colors represent low values and dark colors represent high values. The opposite trend in the figure 3d and 3e is for hypertrophic chondrogenesis.



**A**

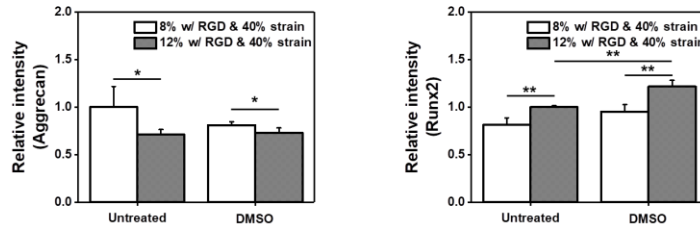

**B**

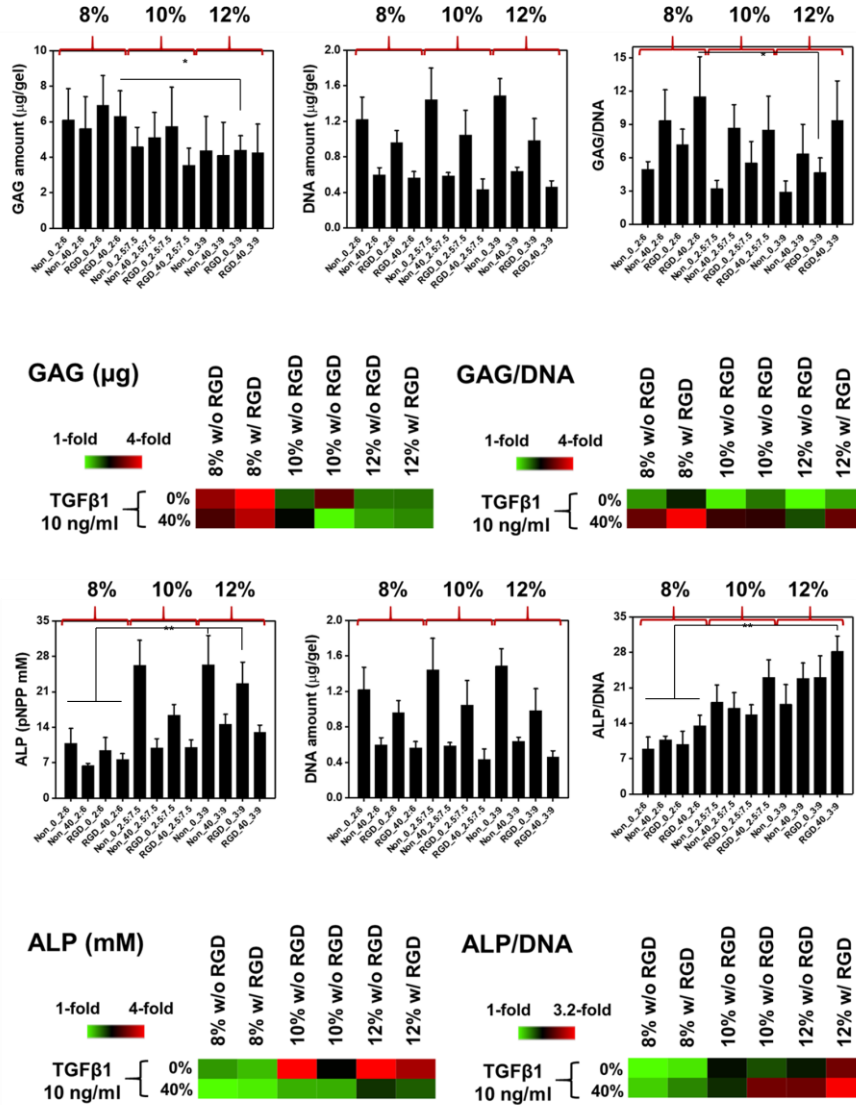

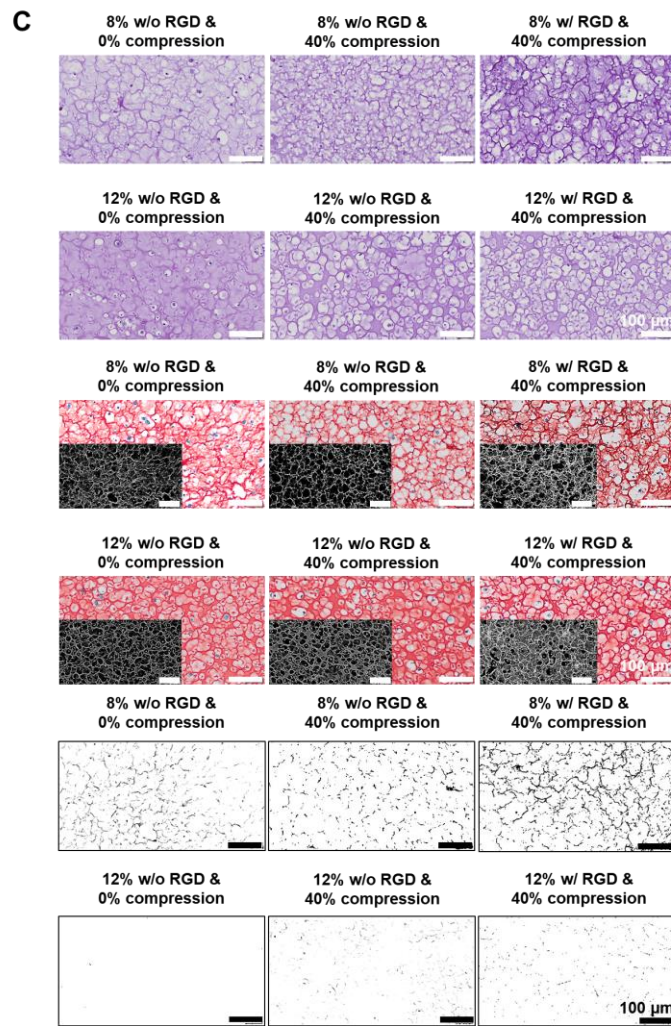

**Fig. S7. Crosslinking density of PEG/OMA regulating articular or hypertrophic chondrogenesis of hMSCs.** (A) Relative Aggrecan or Runx2 intensity of hMSCs when supplemented with DMSO for 21 days ( $N = 4$ ). (B) Quantification of DNA, GAG (GAG/DNA), and ALP (ALP/DNA) for 21 days in culture of hMSCs in with or without RGD-conjugated PEG/OMA gels with the supplement of TGF- $\beta$ 1 under 40% compression compared to those cultured without compression ( $N = 6$ ). (another experiment set, different from Fig. 4A) (One-way ANOVA with Tukey post hoc testing across the all conditions, \* $p < 0.05$ , \*\* $p < 0.005$ ) (C) Hematoxylin and eosin and Safranin O staining of cartilage tissues where cells are cultured in different compositions (8% or 12%) with or without RGD or compression. Images of Safranin O staining were thresholded for imaging analysis. Scale bar is 100  $\mu$ m.

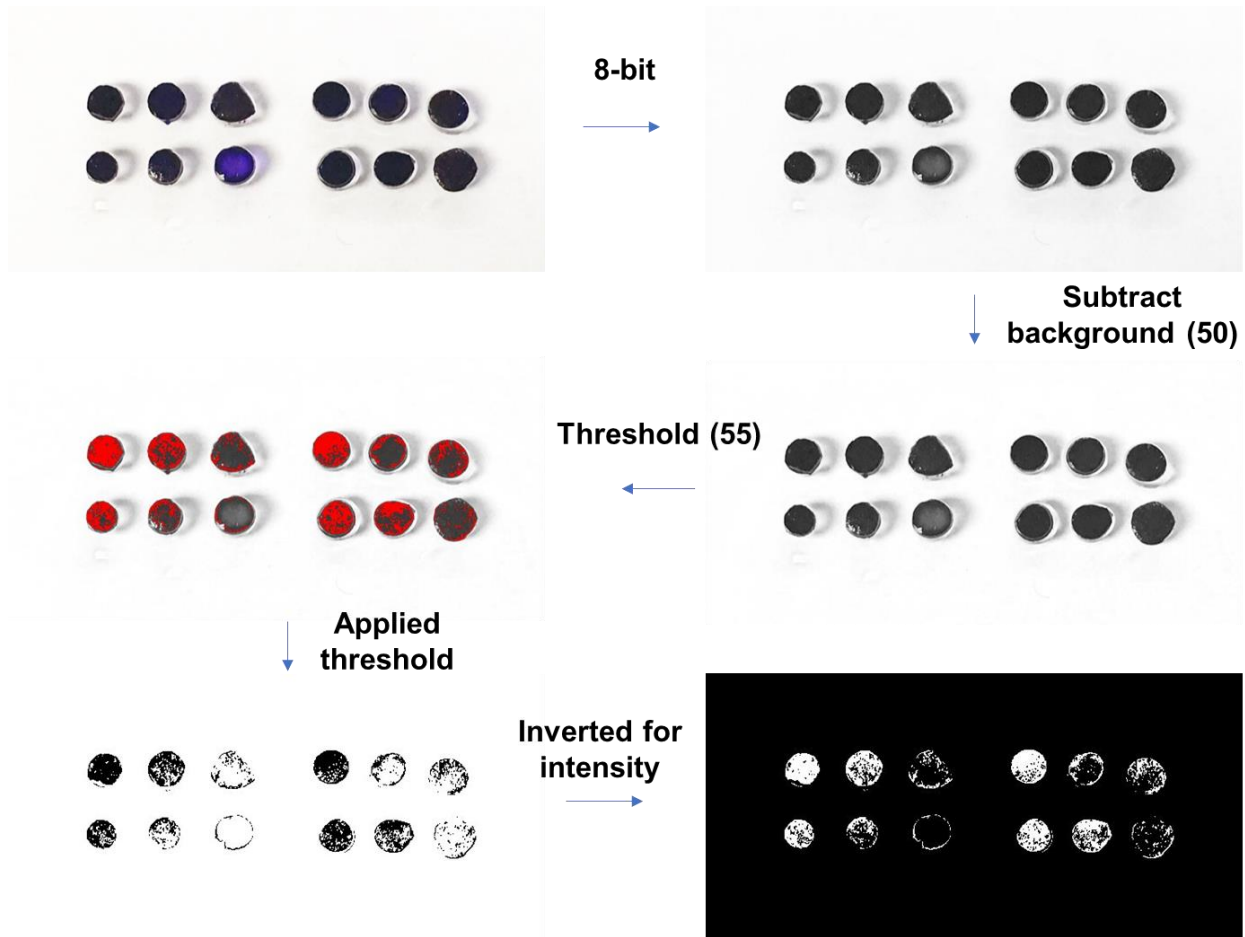

**Fig. S8.** A flow chart for threshold-based imaging analysis of cartilage tissues stained with toluidine blue O where cells are cultured in different compositions (8% or 12%) with or without RGD or compression.

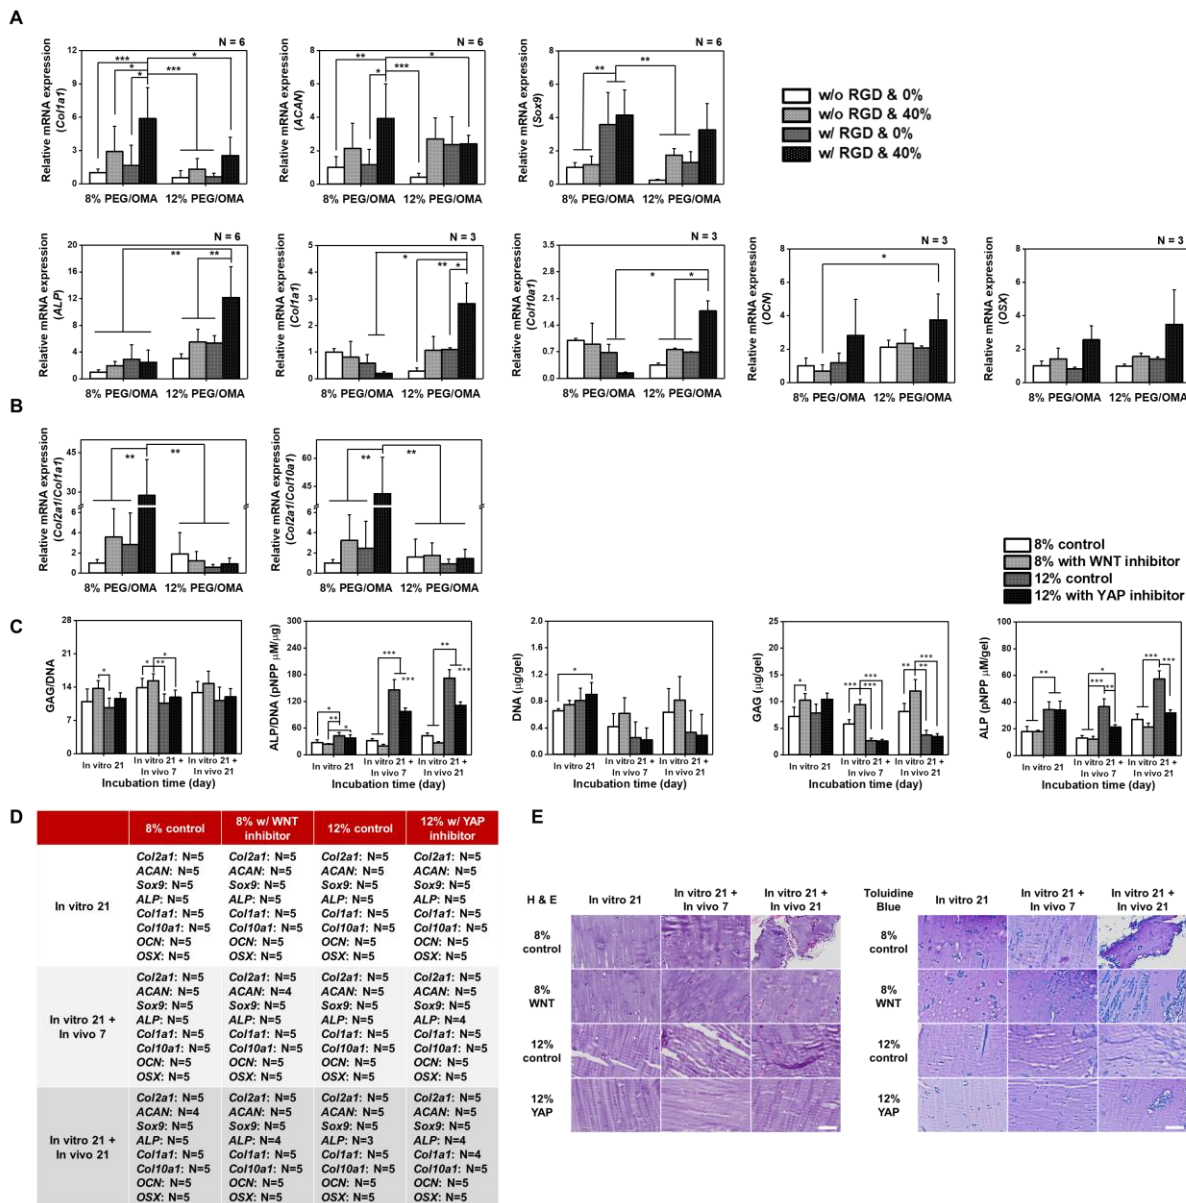

**Fig. S9. Inhibition of YAP-dependent mechanotransduction and WNT signaling pathway enabling the prevention of hypertrophic transition of prechondrogenic hMSCs.** (A) Quantification of real-time PCR to measure the gene expression associated with chondrogenic or osteogenic differentiation for cells cultured for 21 days with or without RGD or 40% compression. (B) Ratio of relative mRNA expression (collagen II/Collagen I and Collagen II/Collagen X) for cells cultured for 21 days. (C) Quantification of DNA, GAG, and ALP for hMSCs precultured (in 8% PEG/OMA with or without WNT inhibitor or 12% PEG/OMA with or without YAP inhibitor) for 21 days in vitro and implanted in vivo for 7 or 21 days ( $N = 6$ ). (D) Number of replicates for different markers and conditions. (E) Hematoxylin and eosin and toluidine blue staining of cartilage tissues after encapsulated cells were cultured for 21 days with or without inhibitors and transplanted in vivo for 7 or 21 days after the in vitro pre-treatment. Scale bar is 100  $\mu\text{m}$ . (\* $p < 0.05$ , \*\* $p < 0.005$ , \*\*\* $p < 0.0005$  based on One-way ANOVA with Tukey post hoc testing)

**A**

| Antibody               | Company                                          | Catalog # | Dilution/<br>Application |
|------------------------|--------------------------------------------------|-----------|--------------------------|
| DAPI                   | SIGMA                                            | D9564     | 1:5000/IF                |
| Actin (594-phalloidin) | INVITROGEN                                       | A12381    | 1:200/IF                 |
| Goat 488-anti-rabbit   | ABCAM                                            | AB150077  | 1:200/IF                 |
| Goat 647-anti-mouse    | ABCAM                                            | AB60316   | 1:200/IF                 |
| Collagen II            | ABCAM                                            | AB34712   | 1:500/IF                 |
| Aggrecan               | ABCAM                                            | AB3778    | 1:250/IF                 |
| Runx2                  | ABCAM                                            | AB23981   | 1:500/IF                 |
| YAP                    | SANTA CRUZ<br>BIOTECHNOLOGY                      | SC-271134 | 1:250/IF                 |
| a5b1                   | MILLIPORE                                        | MAB1969   | 1 µg/ml, blocking        |
| Toluidine blue O       | Fisher chemical                                  | BP107-10  | Vendor's protocol        |
| Safranin O             | Fisher chemical                                  | S670-25   | Vendor's protocol        |
| Hematoxylin            | Fisher chemical                                  | H345-25   | Vendor's protocol        |
| Eosin                  | Thermo Scientific<br>Richard-Allan<br>Scientific | 71-11L    | Vendor's protocol        |

**B**

| Primary        | Forward                | Reverse                 |
|----------------|------------------------|-------------------------|
| <i>Col2a1</i>  | GGAAACTTTGCTGCCAGATG   | TCACCAGGTTACCAGGATTGC   |
| <i>ACAN</i>    | TGCGGGTCAACAGTGCCTATC  | CACGATGCCTTTACCACGAC    |
| <i>Sox9</i>    | CACACAGCTCACTCGACCTTG  | TTGGTTATTTTAGGATCATCTCG |
| <i>ALP</i>     | CCACGTCTCACATTTGGTG    | GCAGTGAAGGGCTTCTTGTC    |
| <i>Col1a1</i>  | GATGGATTCCAGTTCGAGTATG | GTTTGGGTTGCTTGCTGTTTG   |
| <i>Col10a1</i> | AAAGGCCCACTACCCAACAC   | CTTCCGTAGCCTGGTTTTCC    |
| <i>OCN</i>     | ATGAGAGCCCTCACACTCCTC  | CGTAGAAGCGCCGATAGGC     |
| <i>OSX</i>     | TGGCTAGGTGGTGGGCAGGG   | TGGGCAGCTGGGGTTCACT     |
| <i>GAPDH</i>   | GGGGCTGGCATTGCCCTCAA   | GGCTGGTGGTCCAGGGTCT     |

**Table S1.** (A) Antibody information for immunostaining, flow cytometry analysis, and integrin blocking. (B) qRT-PCR primer sequence information.
